## Correction: Association of baseline inflammatory biomarkers with cancer mortality in the REGARDS cohort

**Tomi Akinyemiju<sup>1</sup>, Justin X. Moore<sup>2</sup>, Daniel Tefera Dibaba<sup>3</sup>, Maria Pisu<sup>4</sup>, Michael Goodman<sup>5</sup>, Virginia J. Howard<sup>6</sup>, Monika Safford<sup>7</sup>, Susan C. Gilchrist<sup>8</sup>, Mary Cushman<sup>9</sup>, LeAnn Long<sup>10</sup> and Suzanne E. Judd<sup>10</sup>**

<sup>1</sup>Department of Population Health Sciences, Duke University School of Medicine, Durham, NC, USA

<sup>2</sup>Division of Public Health Sciences and Siteman Cancer Center, Washington University School of Medicine, St. Louis, MO, USA

<sup>3</sup>Tennessee Clinical and Translational Science Institute, University of Tennessee Health Science Center, Memphis, TN, USA

<sup>4</sup>Division of Preventive Medicine, University of Alabama at Birmingham, Birmingham AL, USA

<sup>5</sup>Department of Epidemiology, Emory University Rollins School of Public Health, Atlanta, GA, USA

<sup>6</sup>Department of Epidemiology, University of Alabama at Birmingham, Birmingham AL, USA

<sup>7</sup>Department of Medicine, Weill Cornell Medical College, New York, NY, USA

<sup>8</sup>Department of Clinical Cancer Prevention and Cardiology, The University of Texas MD Anderson Cancer Center, Houston, TX, USA

<sup>9</sup>Department of Medicine and Vermont Cancer Center, Larner College of Medicine at the University of Vermont, Burlington, VT, USA

<sup>10</sup>Department of Biostatistics, University of Alabama at Birmingham, Birmingham, AL, USA

**Published:** February 18, 2020

**Copyright:** Akinyemiju et al. This is an open-access article distributed under the terms of the Creative Commons Attribution License 3.0 (CC BY 3.0), which permits unrestricted use, distribution, and reproduction in any medium, provided the original author and source are credited.

**This article has been corrected:** The third author in the listing, along with a new affiliation, has been added as follows:

**Daniel Tefera Dibaba<sup>3</sup>**

<sup>3</sup>Tennessee Clinical and Translational Science Institute, University of Tennessee Health Science Center, Memphis, TN, USA

Original article: Oncotarget. 2019; 10:4857–4867. <https://doi.org/10.18632/oncotarget.27108>
